# Supplementary material
Source: publisher figshare collection journal article supplement (https://osapublishing.figshare.com/ndownloader/files/30850999)
Supplement: Supplementary file 1 [file 30850999]

## Centrifugal motion of an optically levitated particle: supplement

KAI ZENG,  JUNJI PU, YULIE WU,\* DINGBANG XIAO, AND XUEZHONG WU

*College of Intelligence Science and Technology, National University of Defense Technology, Changsha 410073, China*

*\*Corresponding author: [ylwu\\_nudt@sina.com](mailto:ylwu_nudt@sina.com)*

---

This supplement published with Optica Publishing Group on 13 September 2021 by The Authors under the terms of the [Creative Commons Attribution 4.0 License](https://creativecommons.org/licenses/by/4.0/) in the format provided by the authors and unedited. Further distribution of this work must maintain attribution to the author(s) and the published article's title, journal citation, and DOI.

Supplement DOI: <https://doi.org/10.6084/m9.figshare.15302664>

Parent Article DOI: <https://doi.org/10.1364/OL.435167>

# Centrifugal motion of an optically levitated particle: supplemental 1

Kai Zeng, Junji Pu, Yulie Wu,\* Dingbang Xiao and Xuezhong Wu

College of Intelligence Science and Technology, National University of Defense Technology, Changsha 410073, China

\*Corresponding author: ylwu\_nudt@sina.com

As shown in Fig. S1, the position vector of the levitated particle is

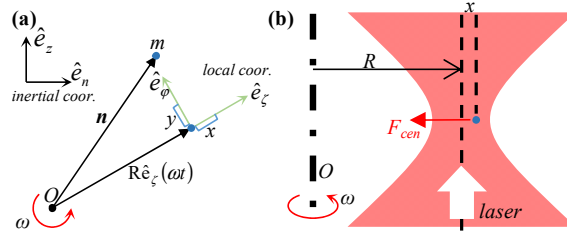

Fig. S1 Schematic illustration of centrifugal motion of a levitated particle.

$$\mathbf{n} = (R + x)\hat{e}_z(\omega t) + y\hat{e}_\phi(\omega t) \quad (\text{S1})$$

In (S1), the transfer of the local coordinate to the inertial coordinate are as follow

$$\begin{aligned} \hat{e}_z(\omega t) &= \cos(\omega t)\hat{e}_n + \sin(\omega t)\hat{e}_z \\ \hat{e}_\phi(\omega t) &= -\sin(\omega t)\hat{e}_n + \cos(\omega t)\hat{e}_z \end{aligned} \quad (\text{S2})$$

The net force applied on the particle is

$$m\ddot{\mathbf{n}} = -k(\mathbf{n} - R\hat{e}_z) - \Gamma m(\dot{\mathbf{n}} - \dot{\mathbf{n}}_{\text{air}}) \quad (\text{S3})$$

In which,  $m$  is the mass of the levitated particle,  $k$  is the stiffness of the optical trap,  $\Gamma$  is the damping coefficient, and velocity and accelerate of the particle are

$$\begin{aligned} \dot{\mathbf{n}} &= (\dot{x} - \omega y)\hat{e}_z + (R\omega + x\omega + \dot{y})\hat{e}_\phi \\ \ddot{\mathbf{n}} &= (\ddot{x} - 2\omega\dot{y} - \omega^2(R + x))\hat{e}_z + (\ddot{y} + 2\omega\dot{x} - \omega^2 y)\hat{e}_\phi \end{aligned} \quad (\text{S4})$$

where  $2\omega\dot{x}$  and  $2\omega\dot{y}$  are Coriolis accelerate,  $\omega^2(R+x)$  and  $\omega^2 y$  are centrifugal accelerate.  $\dot{\mathbf{n}}_{\text{air}}$  is the velocity of air in a  $5 \times 5 \times 1 \text{ mm}$  sealed chamber (Fig. 2). The velocity of air on the different position is simply approximated as

$$\dot{\mathbf{n}}_{\text{air}}(x\hat{e}_z, y\hat{e}_\phi) = \alpha(-\omega y)\hat{e}_z + \beta(R\omega + x\omega)\hat{e}_\phi \quad (\text{S5})$$

where  $\alpha$  and  $\beta$  are empirical coefficients to describe the velocity difference with chamber,  $(x\hat{e}_z, y\hat{e}_\phi)$  represents the particle position. Since the particle moves relative to the chamber, the air around the particle is changed. In this case, the relative motion between the particle and the air is

$$\dot{\mathbf{n}} - \dot{\mathbf{n}}_{\text{air}} = [\dot{x} + (\alpha - 1)\omega y]\hat{e}_z + [\dot{y} + (1 - \beta)\omega(R + x)]\hat{e}_\phi \quad (\text{S6})$$

Therefore, the coupled equations of motion are:

$$\begin{aligned}
m[\ddot{x} - 2\omega\dot{y} - \omega^2(R+x)] &= -kx - \Gamma m[\dot{x} + (\alpha-1)\omega y] \\
m(\ddot{y} + 2\omega\dot{x} - \omega^2 y) &= -ky - \Gamma m[\dot{y} + (1-\beta)\omega(R+x)]
\end{aligned} \tag{S7}$$

When the turntable rotates at constant  $\omega$  (steady state), the particle deviate from the center in a constant distance. Therefore, the Coriolis accelerate, velocity and accelerate in  $x$  and  $y$  can be neglected. In the steady state, the air in the chamber would follow the rotation, hence  $\alpha$  and  $\beta$  can be approximated as 1. The equations of motion can be rewrite as:

$$\begin{aligned}
\left(\frac{k}{m} - \omega^2\right)x &= \omega^2 R \\
\left(\frac{k}{m} - \omega^2\right)y &= 0
\end{aligned} \tag{S8}$$

$\sqrt{k/m} = 2\pi f = 345 \gg \omega$  ( $\omega < 2\pi$ ),  $f = 54\text{Hz}$  is the transverse oscillation frequency of the trapped particle in our experiment. After ignoring the smaller value, the equilibrium position of the particle are:

$$\begin{aligned}
x &= \frac{mR}{k} \omega^2 \\
y &= 0
\end{aligned} \tag{S9}$$
